# Supplementary material for: Effects of Sediment Types on the Distribution and Diversity of Plant Communities in the Poyang Lake Wetlands
Source: MDPI journal article supplement (doi:10.3390/d14060491), 2022-06-16
Supplement: s1 [file s1]

**Table S1.** Information about the 12 sampled field transects.

| Code | Name        | Longitude and latitude of transect |                           | Quantity |
|------|-------------|------------------------------------|---------------------------|----------|
|      |             | Starting point                     | Endpoint                  |          |
| DC   | Dachahu     | E 116.051022; N 29.164868          | E 116.049737; N 29.158826 | 15       |
| WC   | Wucheng     | E 116.022044; N 29.186239          | E 116.008751; N 29.171216 | 15       |
| DH   | Donghu      | E 116.365097; N 28.970248          | E 116.371676; N 28.974027 | 15       |
| NJ   | Nanji       | E 116.258045; N 28.909698          | E 116.248154; N 28.893220 | 15       |
| JS   | Xiaojishan  | E 116.113698; N 29.271866          | E 116.108239; N 29.272484 | 15       |
| SS   | Sheshan     | E 116.112839; N 29.319145          | E 116.113299; N 29.319663 | 10       |
| HJZ  | Huangjinzui | E 116.280045; N 29.205432          | E 116.294953; N 29.192965 | 15       |
| DZS  | Dazuishan   | E 116.354189; N 29.166464          | E 116.342015; N 29.162524 | 10       |
| HS   | Huashan     | E 116.338188; N 29.154236          | E 116.338803; N 29.157339 | 10       |
| TYD1 | Tangyindao1 | E 116.374622; N 29.101474          | E 116.371748; N 29.100039 | 10       |
| TYD2 | Tangyindao2 | E 116.372593; N 29.106708          | E 116.369308; N 29.104934 | 10       |
| TYD3 | Tangyindao3 | E 116.367491; N 29.111772          | E 116.369416; N 29.112902 | 10       |

# Silhouette Width-Chordal Distance (Ward Cluster)

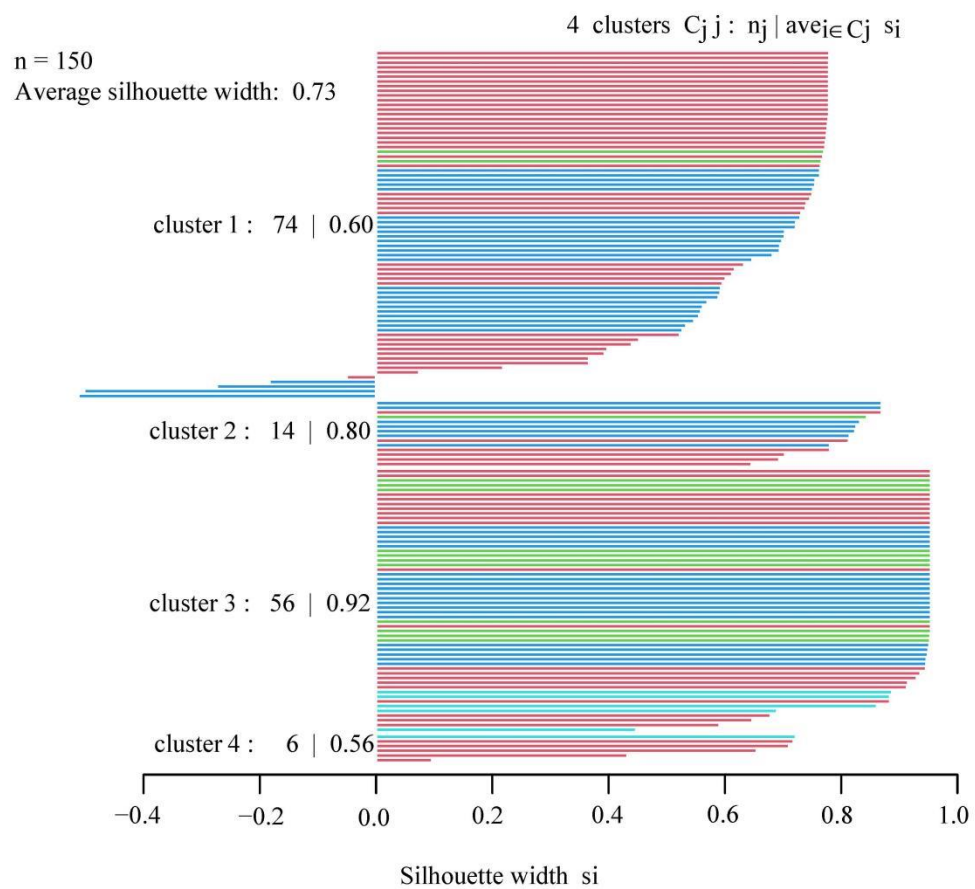

**Figure S1.** Silhouette width of plant groups.
